# Supplementary material for: Bond-bending isomerism and metallophilicity in metal–halogen anions (Cu,Ag,Au)2X3−, X = F, Cl, Br, I, At
Source: Royal Society of Chemistry journal article supplement (doi:10.1039/d2ra07457e), 2023-01-01
Supplement: d2ra07457e1.pdf [file d2ra07457e1.pdf]

Bond-bending isomerism and metallophilicity in clusters  
 $(Cu,Ag,Au)_2X_3^-$ ,  $X = F, Cl, Br, I, At$ .

Bruno Siberchicot<sup>1,2</sup> and Jean Aupiais<sup>1</sup>

Supplementary Information

Table I: Structural equilibrium parameters (<Au-X-Au> angle and bond lengths) in  
 $(Au_2X_3)^-$ ,  $X = F, Cl, Br, I, At$

|               | Acute angle minima |        |        |       | Obtuse angle minima |        |        |       |
|---------------|--------------------|--------|--------|-------|---------------------|--------|--------|-------|
|               | $\Theta^\circ$     | d1 (Å) | d2 (Å) | d (Å) | $\Theta^\circ$      | d1 (Å) | d2 (Å) | d (Å) |
| F             | -                  | -      | -      | -     | 112.39              | 2.059  | 1.958  | 3.412 |
| Cl            | -                  | -      | -      | -     | 102.41              | 2.313  | 2.262  | 3.587 |
| <i>Ma [1]</i> | -                  | -      | -      | -     | 105.39              | -      | -      | 3.690 |
| Br            | -                  | -      | -      | -     | 99.99               | 2.433  | 2.396  | 3.743 |
| I             | 66.27              | 2.650  | 2.575  | 2.909 | 97.17               | 2.601  | 2.572  | 3.902 |
| <i>Li [2]</i> | 72.00              | 2.620  | 2.560  | 3.080 | 100.70              | 2.590  | 2.560  | 3.990 |
| At            | 60.50              | 2.815  | 2.707  | 2.835 | 94.00               | 2.732  | 2.702  | 3.997 |

Table II: Bader analysis of acute  $(Au_2X_3)^-$ ,  $X = I, At$  clusters

|                | $\lambda_1$ | $\lambda_2$ | $\lambda_3$ | $\nabla^2\rho(r_c)$ | $\rho(r_c)$ | $G(r_c)$ | $V(r_c)$ | $H(r_c)$ |
|----------------|-------------|-------------|-------------|---------------------|-------------|----------|----------|----------|
| $(Au_2I_3)^-$  | -0.0272     | -0.0143     | 0.1166      | 0.0752              | 0.0392      | 0.0255   | -0.0412  | -0.0157  |
| $(Au_2At_3)^-$ | -0.0608     | -0.0542     | 0.1941      | 0.0791              | 0.0728      | 0.0489   | -0.0790  | -0.0308  |
| $(Ag_2At_3)^-$ | -0.0577     | -0.0478     | 0.2148      | 0.0109              | 0.0637      | 0.0310   | -0.0460  | -0.0151  |

Table III: Structural equilibrium parameters (<Ag-X-Ag> angle and bond lengths) in  
 $(Ag_2X_3)^-$ ,  $X = F, Cl, Br, I, At$

|    | Acute angle minima |        |        |       | Obtuse angle minima |        |        |       |
|----|--------------------|--------|--------|-------|---------------------|--------|--------|-------|
|    | $\Theta^\circ$     | d1 (Å) | d2 (Å) | d (Å) | $\Theta^\circ$      | d1 (Å) | d2 (Å) | d (Å) |
| F  | -                  | -      | -      | -     | 115.69              | 2.096  | 2.006  | 3.548 |
| Cl | -                  | -      | -      | -     | 92.14               | 2.379  | 2.313  | 3.427 |
| Br | 75.14              | 2.516  | 2.444  | 3.068 | -                   | -      | -      | -     |
| I  | 67.77              | 2.691  | 2.620  | 2.997 | -                   | -      | -      | -     |
| At | 61.94              | 2.816  | 2.735  | 2.899 | -                   | -      | -      | -     |

Table IV: Structural equilibrium parameters (<Cu-X-Cu> angle and bond lengths in  $(Cu_2X_3)^-$ ,  $X = F, Cl, Br, I, At$ )

|    | Acute angle minima |        |        |       | Obtuse angle minima |        |        |       |
|----|--------------------|--------|--------|-------|---------------------|--------|--------|-------|
|    | $\Theta^\circ$     | d1 (Å) | d2 (Å) | d (Å) | $\Theta^\circ$      | d1 (Å) | d2 (Å) | d (Å) |
| F  | 95.85              | 1.870  | 1.785  | 2.776 | -                   | -      | -      | -     |
| Cl | 76.18              | 2.158  | 2.101  | 2.667 | -                   | -      | -      | -     |
| Br | 69.15              | 2.300  | 2.237  | 2.610 | -                   | -      | -      | -     |
| I  | 61.05              | 2.492  | 2.427  | 2.531 | -                   | -      | -      | -     |
| At | 57.15              | 2.621  | 2.539  | 2.197 | -                   | -      | -      | -     |

- 1- Ma Y., Bian S., Shi Y., Fan X., Kong X., Size Effect on Auophilic Interaction in Gold-Chloride Cluster Anions of  $(Au_nCl_{n+1})^-$ ,  $2 \leq n \leq 7$ , *ACS Omega*, **4**, 650-654, (2019)
- 2- W. L. Li, H. T. Liu, T. Jian, G. V. Lopez, Z. A. Piazza, D. L. Huang, T. T. Chen, J. Su, P. Yang, X. Chen, L. S. Wang, and J. Li, *Chem. Sci.* **7**, 475-480, (2016)
